# Supplementary material for: Adsorption of C2H2 on heteroatom-decorated graphene
Source: Royal Society of Chemistry journal article supplement (doi:10.1039/d4nj01608d), 2024-01-01
Supplement: d4nj01608d1.pdf [file d4nj01608d1.pdf]

### Supporting information

Tianzi Cai<sup>a</sup>, Zilong Zhang<sup>a</sup>, Xingyu Gai<sup>a</sup>, Fangmin Zuo<sup>a</sup>, Fengkai Gao<sup>a</sup>, Bolin Wang<sup>a</sup>,  
\* and Haifeng Zhang<sup>a</sup>,\*

<sup>1</sup> School of Chemical Engineering, Northeast Electric Power University, Jilin 132012, China;

\* [bolinwang@neepu.edu.cn](mailto:bolinwang@neepu.edu.cn); [zhfeepu@163.com](mailto:zhfeepu@163.com)

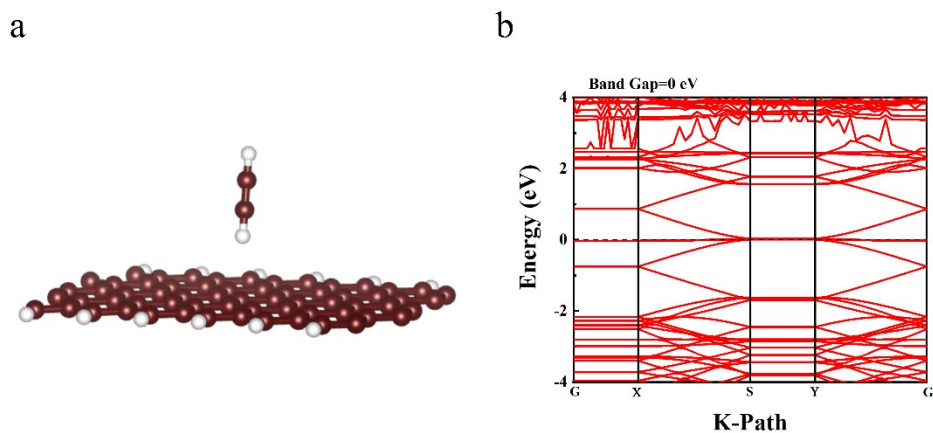

Figure S1. Optimized pristine graphene for C<sub>2</sub>H<sub>2</sub> adsorption (a) C<sub>2</sub>H<sub>2</sub> molecules attached to pristine graphene (b) band structure of pristine graphene (Color key: Brown-C; White-H)

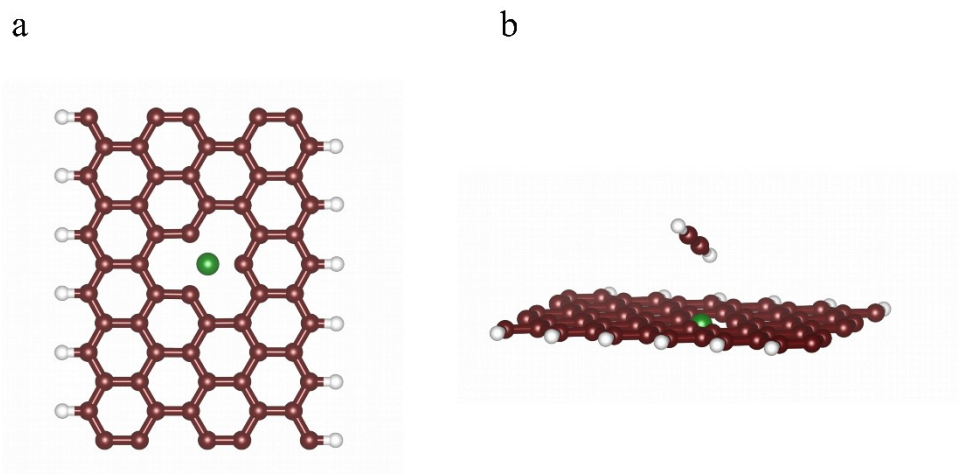

Figure S2. Configuration of single B-doped graphene. (a) B-doped monolayer graphene (b) Optimal configuration of C<sub>2</sub>H<sub>2</sub> gas molecule adsorption on B/G.
